# Supplementary material for: Dedicated bacterial esterases reverse lipopolysaccharide ubiquitylation to block immune sensing
Source: Research Square preprint supplement (doi:10.21203/rs.3.rs-2986327/v1), 2023-07-12
Supplement: Supplementary file 1 [file 4948739ea8e3745a7c3a4bae.docx]

**Chemical synthesis of FP assay reagents**

**General**

General reagents were purchased from Sigma-Aldrich, CombiBlocks, Biosolve, and Acros, and used as received. Solvents were purchased from Biosolve, Sigma-Aldrich and VWR and used as received.

Thin Layer Chromatography (TLC) was performed on Merck aluminium sheets (pre-coated with silica gel 60 F254). Compounds were visualized by UV absorption (254 nm) and by using a solution of KMnO4 (7.5 g L−1) and K2CO3 (50 g L−1) in H2O or a solution of ninhydrin (15 g L-1) in 3% AcOH/EtOH v/v. Compounds (unless stated otherwise) were purified on a Büchi Sepacore automatic flash chromatography system X10/X50. The Büchi Sepacore system was equipped with two Büchi pump modules C-605, a Büchi control unit C-620, a Büchi fraction collector C-660 and a Büchi UV Photometer C-640. The silica columns were purchased at GraceResolvTM and were packed with a grade of Davisil® silica. NMR spectra (1H, 13C) were recorded on a Bruker Ultrashield 300 MHz spectrometer at 298 K. Resonances are indicated with symbols ‘d’ (doublet), ‘ddd’ (double double doublet), ‘dt’ (double triplet), ‘s’ (singlet), ‘t’ (triplet) and ‘m’ (multiplet). Chemical shifts (δ) are given in ppm relative to CDCl3, DMSO-d6 or CD3OD as an internal standard and coupling constants (*J*) are given in hertz (Hz).

LC-MS measurements were performed on a LC-MS system equipped with a Waters Acquity H-Class UPLC system with an Extended λ Photodiode Array Detector (210-800 nm), an Acquity BEH C18 Column (130 Å, 1.7 µm, 2.1 mm x 50 mm) and a LCT-Premier ESI-Orthogonal Acceleration Time of Flight Mass Spectrometer. Samples were run using 3 mobile phases: A = Purified deionized Water (Veolia - H2O), B = Acetonitrile (UPLC grade - CH3CN) and C = 44% H2O, 44% CH3CN, 12% Formic acid (UPLC grade – HCO2H). Data processing was performed using Waters MassLynx Mass Spectrometry Software 4.1. UPLC-MS Program: flow rate = 0.5 mL/min, runtime = 3 min, column T = 40 °C, mass detection: 100–1500 Da. Gradient: Line C, provides a constant 4% of the total composition. Initial conditions 94% A, 2% B, 4% C. at 0.2 min. Composition gradually changes over 1.6 min, to 96 %B and 4% C at 1.80 min. This is kept until 2.15 min before changing back to the original composition at 2.20 min and remains so until the 3 min time mark. Electrospray Ionization (ESI) high-resolution mass spectrometry (HR-MS) was carried on a Waters XEVO-G2 XS Q-TOF mass spectrometer equipped with an electrospray ion source in positive mode (capillary voltage: 3.0 kV, desolvation gas flow: 900 L h−1, temperature: 60 °C) with a resolution R = 22,000 using 200 pg μL−1 Leu-Enk (*m/z* = 556.2771) as a “lock mass”.

RP-HPLC purifications (max. 5 mL/run) were performed on a Shimadzu LC-20AT HPLC system equipped with a Shimadzu SPD-20A UV/Vis detector, a Shimadzu FRC-10A fraction collector and a Waters XBridge BEH C18 OBD Prep Column (130 Å, 5 µm, 10 × 150 mm) was used. Samples were run with a gradient detailed below (run time 35 minutes) at a flowrate = 4.00 or 6.50 mL/min. Mobile phase: A = 0.05% TFA in H2O and B = 0.05% TFA in CH3CN. T = 40 °C.

| Time (min) | 0.05% TFA  in H2O (%) | 0.05% TFA  in CH3CN (%) | Flow rate  (mL/min) |
| --- | --- | --- | --- |
| 0.00 | 95.0 | 5.0 | 4.00 |
| 6.00 | 95.0 | 5.0 | 4.00 |
| 7.00 | 90.0 | 10.0 | 6.50 |
| 10.00 | 71.0 | 29.0 | 6.50 |
| 22.00 | 70 | 30.0 | 6.50 |
| 30.00 | 30 | 70.0 | 6.50 |
| 30.10 | 5.0 | 95.0 | 6.50 |
| 32.00 | 5.0 | 95.0 | 6.50 |
| 32.10 | 95.0 | 5.0 | 6.50 |
| 35.00 | 95.0 | 5.0 | 6.50 |

**General procedure 1**

To a solution of Fmoc protected amino acid (1 eq.) in CH2Cl2 (5 mL/mmol) were added EDC.HCl (1.5 eq.), HOBt (1.5 eq.) and DiPEA (3 eq.) and after 20 minutes H-Gly-OtBu (1.2 eq.) was added. After 16 hours at room temperature the mixture was concentrated under reduced pressure. The residue was dissolved in EtOAc and washed with sat. aq. NaHCO3. The aqueous layer was washed 3 times with EtOAc and the combined organic layers were dried over Na2SO4, filtered and concentrated under reduced pressure. The crude products were purified by flash column chromatography (CH2Cl2🡪 10% MeOH/CH2Cl2).

**Fmoc-Ser(OH)-Gly-OtBu (1a)**

The compound was synthesized according to general procedure 1 starting from Fmoc-Ser-OH (850 mg, 2.60 mmol). The title compound was obtained as a white solid (yield: 438 mg, 0.99 mmol, 38.1%). 1H NMR (300 MHz, CDCl3) δ 7.76 (d, *J =* 7.5 Hz, 1H), 7.59 (d, *J =* 7.4 Hz, 2H), 7.40 (t, *J =* 7.5 Hz, 0H), 7.31 (td, *J =* 7.5, 1.2 Hz, 2H), 6.88 (s, 1H), 5.86 (d, *J =* 7.4 Hz, 1H), 4.43 (d, *J =* 7.0 Hz, 2H), 4.34 – 4.17 (m, 2H), 4.11 (d, *J =* 11.2 Hz, 1H), 3.94 (d, *J =* 5.6 Hz, 2H), 3.70 (s, 1H), 3.25 (s, 1H), 1.46 (s, 9H). 13C NMR (75 MHz, CDCl3) δ 171.33, 143.81, 141.46, 127.91, 127.25, 125.20, 120.17, 82.93, 67.43, 47.24, 42.28, 28.15. MS calculated for C24H28N2O6 [M+H]+ 441.20; found 441.17 at Rt 4.99 minutes.

**Fmoc-Thr(OH)-Gly-OtBu (1b)**

The compound was synthesized according to general procedure 1 starting from Fmoc-Thr-OH (850 mg, 2.49 mmol). The title compound was obtained as a white solid (yield: 442 mg, 0.97 mmol, 39.1%). 1H NMR (300 MHz, CDCl3) δ 7.76 (d, *J =* 7.4 Hz, 1H), 7.60 (d, *J =* 7.4 Hz, 2H), 7.40 (t, *J =* 7.3 Hz, 1H), 7.31 (td, *J =* 7.5, 1.3 Hz, 2H), 6.90 (s, 1H), 5.80 (d, *J =* 7.9 Hz, 1H), 4.54 – 4.36 (m, 3H), 4.28 – 4.12 (m, 2H), 3.96 – 3.89 (m, 2H), 3.38 (s, 1H), 1.45 (s, 9H), 1.19 (d, *J =* 6.5 Hz, 3H). 13C NMR (75 MHz, CDCl3) δ 171.47, 143.83, 141.47, 127.92, 127.24, 125.19, 120.17, 82.83, 67.35, 67.11, 58.94, 47.30, 42.18, 28.15, 18.36. MS calculated for C25H30N2O6 [M+H]+ 455.22; found 455.22 at Rt 5.15 minutes.

**General procedure 2**

Fmoc removal was achieved by the addition of DBU (2 eq.) and HOBt (1.5 eq.) to a solution of **1a** or **1b** (1.0 eq.) in CH2Cl2 (5 mL/mmol) and stirring for 30 minutes. In a separate flask Boc2Rhodamine [*Geurink et al. ChemBioChem 2016; 17; 816-820*] (1.0 eq.) in CH2Cl2 (5 mL/mmol) was treated with EDC.HCl (1.5 eq.), HOBt (1.5 eq.) and DiPEA (3 eq.) for 30 min. The mixture containing the activated Rhodamine species was added to the solution containing the Fmoc-deprotected peptide and the whole mixture was stirred for another 16 hours. Next, the mixture was concentrated under reduced pressure and the residue was dissolved in EtOAc and washed with sat. aq. NaHCO3. The aqueous layer was washed 3 times with EtOAc and the combined organic layers were dried over Na2SO4, filtered and concentrated under reduced pressure. The crude products were purified by flash column chromatography (CH2Cl2🡪 5% MeOH/ CH2Cl2) (DCM🡪 5% MeOH/DCM).

**Boc2Rhodamine-Ser(OH)-Gly-OtBu (2a)**

The compound was synthesized according to general procedure 2 starting from Fmoc-Ser(OH)-Gly-OtBu (**1a**) (100 mg, 227 µmol), and obtained as a slightly orange solid (yield: 76 mg, 109 µmol, 47.9%). 1H NMR (300 MHz, CDCl3) δ 8.47 (m, 1H), 8.11 (dd, *J =* 8.0, 1.6 Hz, 1H), 7.82 (d, *J =* 7.3 Hz, 1H), 7.47 (s, 2H), 7.40 (t, *J =* 5.6 Hz, 1H), 7.10 (d, *J =* 7.4 Hz, 1H), 6.92 (s, 2H), 6.86 (m, 2H), 6.58 (d, *J =* 8.6 Hz, 2H), 4.93 – 4.76 (m, 1H), 4.17 (d, *J =* 11.0 Hz, 1H), 4.08 – 3.94 (m, 3H), 3.91 – 3.81 (m, 1H), 1.50 (s, 18H), 1.42 (s, 9H). 13C NMR (75 MHz, CDCl3) δ 171.03, 168.90, 168.84, 166.37, 156.15, 152.56, 151.92, 141.00, 135.59, 134.67, 128.50, 126.94, 124.49, 124.11, 114.43, 112.24, 106.29, 83.39, 82.85, 81.31, 62.90, 55.19, 42.35, 28.41, 28.12. MS calculated for C40H46N4O12 [M+H]+ 775.32; found 775.20 at Rt 5.86 minutes.

**Boc2Rhodamine-Thr(OH)-Gly-OtBu (2b)**

The compound was synthesized according to general procedure 2 starting from Fmoc-Thr(OH)-Gly-OtBu (**1b**) (100 mg, 220 µmol), and obtained as a slightly orange solid (yield: 79 mg, 111 µmol, 50.5%). 1H NMR (300 MHz, CDCl3) δ 8.45 (dd, *J =* 1.6, 0.8 Hz, 1H), 8.14 (dd, *J =* 8.0, 1.6 Hz, 1H), 7.54 – 7.40 (m, 3H), 7.25 – 7.13 (m, 2H), 6.88 (m, 2H), 6.74 (s, 2H), 6.63 (dd, *J =* 8.6, 1.9 Hz, 2H), 4.69 (dd, *J =* 7.5, 2.5 Hz, 1H), 4.52 (d, *J =* 7.0 Hz, 1H), 4.08 – 3.85 (m, 2H), 3.74 (s, 1H), 1.52 (s, 19H), 1.45 (s, 9H), 1.28 (d, *J =* 6.5 Hz, 3H). 13C NMR (75 MHz, CDCl3) δ 170.98, 168.83, 168.63, 166.60, 156.31, 152.45, 151.99, 140.97, 135.71, 134.51, 128.56, 127.13, 124.66, 123.95, 114.36, 112.36, 106.30, 82.81, 81.37, 66.99, 57.78, 42.25, 28.41, 28.16, 18.51. MS calculated for C41H48N4O12 [M+H]+ 789.33; found 789.26 at Rt 5.97 minutes.

**General procedure 3**

Fmoc-Gly-OH (1.2 eq.) was dissolved in CH2Cl2 (5 mL/mmol) and to this solution were added EDC.HCl (1.5 eq.), HOBt (1.5 eq.) and DiPEA (2 eq.). After 20 min. compound **2a** or **2b** (1 eq.) was added and the mixture was stirred for another 16 hours, before being concentrated under reduced pressure. The residue was dissolved in EtOAc and washed with 1M HCl (aq), sat. aq. NaHCO3, and brine. The organic layer was dried over Na2SO4, filtered and concentrated under reduced pressure. The crude products were purified by flash column chromatography (DCM🡪 5% MeOH/DCM).

**Boc2Rhodamine-Ser(Fmoc-Gly)-Gly-OtBu (3a)**

The compound was synthesized according to general procedure 3, starting from Boc2Rhodamine-Ser(OH)-Gly-OtBu(**2a**) (75 mg, 97 µmol, 1.0 eq.), and obtained as a white solid (yield: 48 mg, 46 µmol, 47.3%). 1H NMR (300 MHz, CDCl3) δ 8.49 (s, 1H), 8.13 (d, *J =* 8.1 Hz, 1H), 7.73 (d, *J =* 1.0 Hz, 2H), 7.69 (d, *J =* 7.5 Hz, 1H), 7.56 (d, *J =* 7.4 Hz, 2H), 7.49 (s, 2H), 7.37 (t, *J =* 1.2 Hz, 2H), 7.27 (t, *J =* 1.2 Hz, 2H), 7.11 (d, *J =* 0.7 Hz, 1H), 6.91 (t, *J =* 5.2 Hz, 1H), 6.87 – 6.77 (m, 2H), 6.68 (s, 2H), 6.60 (dd, *J =* 8.6, 4.1 Hz, 2H), 5.66 (t, *J =* 5.9 Hz, 1H), 5.06 (q, *J =* 5.8 Hz, 1H), 4.59 (d, *J =* 5.3 Hz, 1H), 4.45 – 4.28 (m, 2H), 4.18 (t, *J =* 7.0 Hz, 1H), 4.02 (m, 2H), 3.94 (dd, *J =* 7.9, 5.3 Hz, 2H), 1.52 (s, 19H), 1.43 (s, 9H). 13C NMR (75 MHz, CDCl3) δ 170.29, 168.55, 152.42, 151.98, 143.84, 141.37, 140.92, 135.41, 134.55, 128.56, 127.88, 127.24, 125.20, 120.10, 114.34, 112.35, 106.27, 81.36, 67.37, 64.31, 52.82, 47.15, 42.30, 39.30, 38.47, 28.42, 28.15. MS calculated for C57H59N5O15 [M+H]+ 1054.41; found 1054.29 at Rt 6.85 minutes.

**Boc2Rhodamine-Thr(Fmoc-Gly)-Gly-OtBu (3b)**

The compound was synthesized according to general procedure 3, starting from Boc2Rhodamine-Thr(OH)-Gly-OtBu(**2b**) (78 mg, 99 µmol, 1.0 eq.), and obtained as a white solid (yield: 48 mg, 49 µmol, 49.9%). 1H NMR (300 MHz, CDCl3) δ 8.47 (s, 1H), 8.12 (dd, *J =* 8.1, 1.6 Hz, 1H), 7.78 – 7.68 (m, 2H), 7.60 – 7.42 (m, 5H), 7.40 – 7.33 (m, 2H), 7.31 – 7.23 (m, 2H), 7.12 (d, *J =* 8.0 Hz, 1H), 6.94 – 6.79 (m, 3H), 6.68 (d, *J =* 6.1 Hz, 2H), 6.62 (d, 2H), 5.67 (t, *J =* 5.8 Hz, 1H), 5.63 – 5.50 (m, 1H), 4.92 (dd, *J =* 7.7, 4.4 Hz, 1H), 4.36 (q, *J =* 6.3 Hz, 2H), 4.19 (t, *J =* 7.1 Hz, 1H), 4.08 – 3.83 (m, 4H), 1.52 (s, 18H), 1.44 (s, 9H), 1.38 (d, 3H). 13C NMR (75 MHz, CDCl3) δ 170.19, 168.43, 168.15, 152.30, 151.85, 141.25, 140.79, 135.28, 128.44, 127.75, 127.12, 127.01, 125.07, 119.98, 114.21, 112.22, 106.14, 81.23, 77.46, 77.04, 76.61, 67.27, 64.38, 52.69, 47.03, 42.95, 42.17, 38.35, 28.29, 28.03. MS calculated for C58H61N5O15 [M+H]+ 1068.42; found 1068.35 at Rt 6.92 minutes.

**General procedure 4**

Compound **3a** or **3b** (1 eq.) was dissolved in CH2Cl2 and treated with DBU (0.5 eq.) for 10 min. after which HOBt (1 eq.) was added and the mixture was stirred for another 20 min. LC-MS analysis revealed partial hydrolysis of the ester. The resulting free glycine was removed by a small flash column chromatography using silica gel in a Pasteur pipette stuffed with some cotton. The crude mixture was loaded onto the column and flushed with 2 column volumes CH2Cl2. The deprotected dipeptide was eluted with 5 vol.% MeOH/CH2Cl2 and obtained after removal of the solvent under reduced pressure. Protected ubiquitin(1-75, Nle1) with a free C-terminal carboxylic acid [*Van Tol et al. Nat Commun. 14, 1661 (2023). https://doi.org/10.1038/s41467-023-37363-6*] (0.33 eq.) was dissolved in CH2Cl2 (0.5 mL) and treated with EDC.HCl (1.65 eq.), HOBt (1.65 eq.) and DiPEA (2 eq.). To this was added the Fmoc-deprotected peptide (in 0.5 mL CH2Cl2) and the mixture was stirred for 6 hours. The solvent was removed under reduced pressure. Global deprotection of the ubiquitinated peptide was achieved by treating the crude product with 3 mL cleavage mixture (TFA/H2O/phenol/iPr3SiH 90.5/5/2.5/2 v/v/v/v) for 3 hours. The reaction mixture was poured directly into cold Et2O/n-pentane (1/1 v/v), the precipitated protein was centrifuged and the Et2O/n-pentane was removed by decanting. The protein was washed three times with Et2O and centrifuged. The pellet was dissolved in DMSO and purified by RP-HPLC. Product fractions were pooled and lyophilized and the products were obtained as orange solids.

**Rhodamine-Ser(Ub1-76)-Gly-OH (4a)**

The compound was synthesized according to general procedure 4, starting from Boc2Rhodamine-Ser(Fmoc-Gly)-Gly-OtBu (**3a**) (16 mg, 15 µmol, 1.0 eq.) and protected ubiquitin(1-75, Nle1) with a free C-terminal carboxylic acid (5.0 µmol, 0.33 eq.) and obtained as an orange solid (yield: 2.4 mg, 0.26 µmol, 5.3%). MS calculated 9048; found after deconvolution 9048 at Rt 3.25 minutes.

**Rhodamine-Thr(Ub1-76)-Gly-OH (4b)**

The compound was synthesized according to general procedure 4, starting from Boc2Rhodamine-Thr(Fmoc-Gly)-Gly-OtBu (**3a**) (16 mg, 15 µmol, 1.0 eq.) and protected ubiquitin(1-75, Nle1) with a free C-terminal carboxylic acid (5.0 µmol, 0.33 eq.). The title compound was obtained as an orange solid (yield: 1.6 mg, 0.18 µmol, 3.5%). MS calculated 9062; found after deconvolution 9062 at Rt 3.22 minutes.
